# Supplementary material for: Optimizing High-risk Infant Follow-up in Nonresearch-based Paradigms: The New England Follow-up Network
Source: PubMed Central journal article supplement — Pediatr Qual Saf. 2020 May 5;5(3):e287. doi: 10.1097/pq9.0000000000000287 (PMC7297406; doi:10.1097/pq9.0000000000000287), 2020-05-05
Supplement: pqs-5-e287-s001.pdf [file pqs-5-e287-s001.pdf]

VERMONT OXFORD NETWORK - Infant Follow-Up - *HEALTH STATUS REPORT*

Center Number: \_\_\_\_\_ Center Name: \_\_\_\_\_  
 Network ID Number: \_\_\_\_\_ Year of Birth (YYYY): \_\_\_\_\_  
 Follow-up Category:  ELBW 2016  Clinical study (*specify*): \_\_\_\_\_  
 Status at 18 – 24 Months Corrected Age:  Alive  Expired  Unknown  
 Consent Obtained:  Yes  No

**SECTION A: HEALTH STATUS**

1. Corrected Age at the follow-up visit (months/days): \_\_\_\_ months \_\_\_\_ days

**SECTION B: LIVING SITUATION**

2. Maternal Age at Infant Birth: \_\_\_\_ years  Unknown  
 3. Home Child Resides:  Parent/Family member  Foster care  Institutional  
 4. Caregivers:  Single parent  Two parent  Institutional  
*Check (✓) only one*  Single parent extended family  Two parent extended family  
 5. Primary Caregiver Education:  Some High School or less  Some college/university  
*Check (✓) only one*  High School degree/GED  College/university degree  
 Not applicable  Unknown

**USA CENTERS ONLY**

6. Income Below 2016 HHS Poverty Guideline:  Yes  No  Unknown  
 7. Caregiver(s) Primary Language:  English  Spanish  Other

| Income 2016 HHS Poverty Guidelines<br>(48 contiguous states and District of Columbia) |           |            |           |
|---------------------------------------------------------------------------------------|-----------|------------|-----------|
| Persons                                                                               | Income    | Persons    | Income    |
| 2                                                                                     | \$ 16,020 | 6          | \$ 32,580 |
| 3                                                                                     | \$ 20,160 | 7          | \$ 36,730 |
| 4                                                                                     | \$ 24,300 | 8          | \$ 40,890 |
| 5                                                                                     | \$ 28,440 | Additional | \$ 4,160  |

*Source: Federal Registrar Vol. 81, No.15, January 25, 2016, pp.4036-4037.*

**SECTION C: SUPPORT AFTER DISCHARGE**

8. Any Outpatient Support:  Yes  No  Unsure  
*If yes, complete the following*

|                                       | Any time after discharge     |                             |                                 | At present clinic visit      |                             |
|---------------------------------------|------------------------------|-----------------------------|---------------------------------|------------------------------|-----------------------------|
| a. Tracheostomy:                      | <input type="checkbox"/> Yes | <input type="checkbox"/> No | <input type="checkbox"/> Unsure | <input type="checkbox"/> Yes | <input type="checkbox"/> No |
| b. Ventilator:                        | <input type="checkbox"/> Yes | <input type="checkbox"/> No | <input type="checkbox"/> Unsure | <input type="checkbox"/> Yes | <input type="checkbox"/> No |
| c. Oxygen:                            | <input type="checkbox"/> Yes | <input type="checkbox"/> No | <input type="checkbox"/> Unsure | <input type="checkbox"/> Yes | <input type="checkbox"/> No |
| d. Gastrostomy:                       | <input type="checkbox"/> Yes | <input type="checkbox"/> No | <input type="checkbox"/> Unsure | <input type="checkbox"/> Yes | <input type="checkbox"/> No |
| e. Nasogastric or Post-pyloric Feeds: | <input type="checkbox"/> Yes | <input type="checkbox"/> No | <input type="checkbox"/> Unsure | <input type="checkbox"/> Yes | <input type="checkbox"/> No |
| f. Apnea or CP monitor:               | <input type="checkbox"/> Yes | <input type="checkbox"/> No | <input type="checkbox"/> Unsure | <input type="checkbox"/> Yes | <input type="checkbox"/> No |
| g. Pulse Oximetry:                    | <input type="checkbox"/> Yes | <input type="checkbox"/> No | <input type="checkbox"/> Unsure | <input type="checkbox"/> Yes | <input type="checkbox"/> No |
| h. Respiratory Medications:           | <input type="checkbox"/> Yes | <input type="checkbox"/> No | <input type="checkbox"/> Unsure | <input type="checkbox"/> Yes | <input type="checkbox"/> No |
| i. Oral Feeding Support:              | <input type="checkbox"/> Yes | <input type="checkbox"/> No | <input type="checkbox"/> Unsure | <input type="checkbox"/> Yes | <input type="checkbox"/> No |
| j. Speech Support:                    | <input type="checkbox"/> Yes | <input type="checkbox"/> No | <input type="checkbox"/> Unsure | <input type="checkbox"/> Yes | <input type="checkbox"/> No |
| k. Motor Support:                     | <input type="checkbox"/> Yes | <input type="checkbox"/> No | <input type="checkbox"/> Unsure | <input type="checkbox"/> Yes | <input type="checkbox"/> No |

*Complete form on reverse side*

**SECTION D: MEDICAL RE-HOSPITALIZATIONS AFTER DISCHARGE**

9. Any Medical Readmissions (after ultimate discharge):  Yes  No  Unsure

*If yes, complete the following* # Admissions

a. Respiratory Illness:  Yes  No  Unsure \_\_\_\_\_

b. Nutrition/ Failure to Thrive:  Yes  No  Unsure \_\_\_\_\_

c. Seizure Disorder:  Yes  No  Unsure \_\_\_\_\_

d. Shunt Complication:  Yes  No  Unsure \_\_\_\_\_

e. *Infections (not respiratory or shunt infections)*

i. Meningitis:  Yes  No  Unsure \_\_\_\_\_

ii. Urinary Tract Infection:  Yes  No  Unsure \_\_\_\_\_

iii. Gastrointestinal Infection:  Yes  No  Unsure \_\_\_\_\_

iv. Other infection:  Yes  No  Unsure \_\_\_\_\_

*If yes, specify:* \_\_\_\_\_

f. Other Medical Readmissions:  Yes  No  Unsure \_\_\_\_\_

*If yes, specify:* \_\_\_\_\_

**SECTION E: SURGERIES**

10. Surgical procedures (after ultimate discharge):  Yes  No  Unsure

*If Yes, put all that apply* # Procedures

a. (P-Code) \_\_\_\_\_ \_\_\_\_\_

b. (P-Code) \_\_\_\_\_ \_\_\_\_\_

c. (P-Code) \_\_\_\_\_ \_\_\_\_\_

d. (P-Code) \_\_\_\_\_ \_\_\_\_\_

e. (P-Code) \_\_\_\_\_ \_\_\_\_\_

**SURGICAL PROCEDURE CODES (P-CODES)**

| P-Code | Procedure                                 | P-Code | Procedure                                        |
|--------|-------------------------------------------|--------|--------------------------------------------------|
|        | <u>Central Nervous System Surgery</u>     |        | <u>Otolaryngology Surgery</u>                    |
| P-101  | Shunt or shunt revision for hydrocephalus | P-501  | Tracheostomy                                     |
| P-102  | Other neurosurgical procedure             | P-502  | Tympanostomy tubes                               |
|        | <u>Congenital Heart Defect Surgery</u>    | P-503  | Other ENT surgical procedure                     |
| P-201  | Cardiac surgery                           |        | <u>Ophthalmologic Surgery</u>                    |
|        | <u>Gastrointestinal Surgery</u>           | P-601  | Retinal cryosurgery or laser surgery: single eye |
| P-301  | Gastrostomy tube placement                | P-602  | Retinal cryosurgery or laser surgery: both eyes  |
| P-302  | Inguinal hernia repair                    | P-603  | Strabismus surgery                               |
| P-303  | Other gastrointestinal surgical procedure | P-604  | Other ophthalmologic surgical procedure          |
|        | <u>Genitourinary Surgery</u>              |        |                                                  |
| P-401  | Circumcision                              | P-900  | <u>Other Surgical Procedure</u>                  |
| P-402  | Other genitourinary surgical procedure    |        |                                                  |

Patient's Name: \_\_\_\_\_ Medical Record: \_\_\_\_\_

(Please do not transmit information in this box)

VERMONT OXFORD NETWORK - Infant Follow-Up - DEVELOPMENTAL STATUS REPORT

Center Number: \_\_\_\_\_

Center Name: \_\_\_\_\_

Network ID Number: \_\_\_\_\_

Year of Birth (YYYY): \_\_\_\_\_

Follow-up Category:  ELBW Birth Year 2016  Clinical trial (specify): \_\_\_\_\_

SECTION A: GROWTH PARAMETERS

- 1. Corrected Age Growth Parameters Were Obtained (months/days): \_\_\_\_\_ months \_\_\_\_\_ days
- 2. Weight: \_\_\_\_\_.\_\_\_\_ kg
- 3. Head Circumference: \_\_\_\_\_.\_\_\_\_ cm

SECTION B: VISION & HEARING

- 4. Post Discharge Eye Treatment:  Laser  Anti-VEGF  Both  Neither  Unsure
- 5. Blindness:  One eye  Both eyes  Neither  Unsure
- 6. Prescription Glasses:  Yes  No
- 7. Hearing Impairment:  One ear  Both ears  Neither  Unsure
- 8. Amplification:  Yes  No

SECTION C: CEREBRAL PALSY

- 9. Cerebral Palsy:  Yes  No
- If Yes, impairment:*  Diplegia  Hemiplegia  Quadriplegia
- If No, muscle tone:*  Hypotonia  Hypertonia  Both  Normal

SECTION D: GROSS MOTOR MILESTONES

- 10. Sits independently:  Yes  No
- If No, sits with support:*  Yes  No
- 11. Walks ten (10) steps independently:  Yes  No
- If No, walks ten (10) steps with support:*  Yes  No

SECTION E: DEVELOPMENTAL TESTING

- 12. Developmental Evaluation:  Completed  Partially completed  Not done
- a. If partially completed or not done, check (✓) why:
  - Neurosensory impairment  Too severely delayed  Uncooperative  Other
- b. If completed or partially completed, check (✓) which test:
  - Bayley Scales of Infant Development-III  Griffiths Mental Development Scales  Other

13. Corrected Age Used In Scoring (months/days): \_\_\_\_\_ months \_\_\_\_\_ days

| 14. Results (BSID-III):                      | Scaled Score | Composite Score |
|----------------------------------------------|--------------|-----------------|
| <input type="checkbox"/> BSID-III Cognitive: | _____        | _____           |
| <input type="checkbox"/> BSID-III Language:  | (Sum) _____  | _____           |
| Expressive Communication:                    | _____        | Not applicable  |
| Receptive Communication:                     | _____        | Not applicable  |
| <input type="checkbox"/> BSID-III Motor:     | (Sum) _____  | _____           |
| Gross Motor:                                 | _____        | Not applicable  |
| Fine Motor:                                  | _____        | Not applicable  |

| 15. Results (GMDS)                                  | Uncorrected Score | Corrected Score |
|-----------------------------------------------------|-------------------|-----------------|
| <input type="checkbox"/> Total Scale (GQ):          | _____             | _____           |
| <input type="checkbox"/> Locomotor:                 | _____             | _____           |
| <input type="checkbox"/> Personal-Social:           | _____             | _____           |
| <input type="checkbox"/> Hearing and Speech:        | _____             | _____           |
| <input type="checkbox"/> Hand and Eye Coordination: | _____             | _____           |
| <input type="checkbox"/> Performance Tests:         | _____             | _____           |

SECTION F: OVERALL CLINICAL APPRAISAL

- 16. Clinical Appraisal: Cognitive function:  Normal  Suspect  Impaired
- Language:  Normal  Suspect  Impaired
- Motor function:  Normal  Suspect  Impaired
